# Supplementary material for: PML-Regulated Mitochondrial Metabolism Enhances Chemosensitivity in Human Ovarian Cancers
Source: PubMed Central journal article supplement (PMC6331342; doi:10.1016/j.cmet.2018.09.002), 2019-01-08
Supplement: mmc1.pdf [file mmc1.pdf]

**Supplemental Information**

**PML-Regulated Mitochondrial Metabolism Enhances**

**Chemosensitivity in Human Ovarian Cancers**

**Géraldine Gentric, Yann Kieffer, Virginie Mieulet, Oumou Goundiam, Claire Bonneau, Fariba Nemati, Ilse Hurbain, Graca Raposo, Tatiana Popova, Marc-Henri Stern, Valérie Lallemand-Breitenbach, Sebastian Müller, Tatiana Cañeque, Raphaël Rodriguez, Anne Vincent-Salomon, Hugues de Thé, Rodrigue Rossignol, and Fatima Mechta-Grigoriou**

**SUPPLEMENTAL INFORMATION for:**

**PML-regulated mitochondrial metabolism  
enhances chemosensitivity in human ovarian cancers**

Géraldine Gentric<sup>1,2\*</sup>, Yann Kieffer<sup>1,2</sup>, Virginie Mieulet<sup>1,2</sup>, Oumou Goundiam<sup>1,2</sup>,  
Claire Bonneau<sup>1,2</sup>, Fariba Nemati<sup>3</sup>, Ilse Hurbain<sup>4,5,6</sup>, Graca Raposo<sup>4,5,6</sup>, Tatiana Popova<sup>2,7</sup>,  
Marc-Henri Stern<sup>2,7</sup>, Valérie Lallemand-Breitenbach<sup>8</sup>, Sebastian Müller<sup>9</sup>, Tatiana Cañeque<sup>9</sup>,  
Raphaël Rodriguez<sup>9</sup>, Anne Vincent-Salomon<sup>10</sup>, Hugues de Thé<sup>8</sup>, Rodrigue Rossignol<sup>11</sup>  
and Fatima Mechta-Grigoriou<sup>1,2,12\*</sup>

Lead Contact: Fatima Mechta-Grigoriou (ORCID Number: 0000-0002-3751-6989) E-mail  
address: [fatima.mechta-grigoriou@curie.fr](mailto:fatima.mechta-grigoriou@curie.fr)

Table S1. Relative to Figure 1. Comparative description of the clinical parameters of the Institut Curie and TCGA cohorts of HGSOc patients

|                                |                                 | <b>Curie</b>                                         | <b>TCGA</b>        |
|--------------------------------|---------------------------------|------------------------------------------------------|--------------------|
|                                |                                 | Mateescu, Nat.Med. 2011<br>Grusso, Nat. Commun. 2016 | TCGA, Nature, 2011 |
| <b>Total number of patient</b> |                                 | <b>127</b>                                           | <b>169</b>         |
| <b>OXPPOS status</b>           | <b>Low</b>                      | 53 (41.7%)                                           | 90 (53.3%)         |
|                                | <b>High</b>                     | 74 (58.3%)                                           | 79 (46.7%)         |
| <b>Median age (years)</b>      | <b>Median age</b>               | 61                                                   | 59                 |
|                                | <b>Min-Max</b>                  | 35-87                                                | 34-87              |
| <b>Histotype</b>               | <b>Serous</b>                   | 127 (100%)                                           | 169 (100%)         |
| <b>FIGO substage</b>           | <b>I</b>                        | 11 (8.7%)                                            | -                  |
|                                | <b>II</b>                       | 10 (7.9%)                                            | 9 (5.3%)           |
|                                | <b>III</b>                      | 83 (65.4%)                                           | 107 (63.3%)        |
|                                | <b>IV</b>                       | 15 (11.8%)                                           | 24 (14.2%)         |
|                                | <b>NA</b>                       | 8 (6.3%)                                             | 29 (17.2%)         |
| <b>Grade</b>                   | <b>High-grade (G2, G3)</b>      | 127 (100%)                                           | 138                |
|                                | <b>G1</b>                       | -                                                    | -                  |
|                                | <b>NA</b>                       | -                                                    | 31                 |
| <b>Ki-67</b>                   | <b>Median</b>                   | 1.9                                                  |                    |
|                                | <b>Min-Max</b>                  | 0-4                                                  |                    |
| <b>Mitotic index</b>           | <b>Median</b>                   | 50                                                   |                    |
|                                | <b>Min-Max</b>                  | 10-185                                               |                    |
| <b>Metabolic Syndrome</b>      | <b>Diabetes</b>                 | 3 (2.5%)                                             |                    |
|                                | <b>High blood pressure</b>      | 22 (18.2%)                                           |                    |
|                                | <b>Dyslipidemia</b>             | 14 (11.6%)                                           |                    |
|                                | <b>Body Mass Index (&gt;30)</b> | 6 (5%)                                               |                    |
| <b>Surgery</b>                 | <b>No macroscopic residual</b>  | 33 (26%)                                             | 17 (10.1%)         |
|                                | <b>Macroscopic residual</b>     | 72 (56.7%)                                           | 103 (60.9%)        |
|                                | <b>NA</b>                       | 22 (17.3%)                                           | 49 (29%)           |
| <b>Chemotherapy</b>            | <b>Yes</b>                      | 123 (96.9%)                                          |                    |
|                                | <b>NA</b>                       | 4 (3.1%)                                             |                    |
| <b>Chemotherapeutic agents</b> | <b>Platinum salt</b>            | 25 (19.7%)                                           |                    |
|                                | <b>Platinum salt + taxanes</b>  | 98 (77.2%)                                           |                    |
|                                | <b>NA</b>                       | 4 (3.1%)                                             |                    |
| <b>Relapse at 12 months</b>    | <b>Yes</b>                      | 54 (42.5%)                                           |                    |
|                                | <b>No</b>                       | 69 (54.3%)                                           |                    |
|                                | <b>NA</b>                       | 4 (3.1%)                                             |                    |
| <b>LST signature</b>           | <b>Low</b>                      | 31 (24.4%)                                           | 68 (40.2%)         |
|                                | <b>High</b>                     | 55 (43.3%)                                           | 97 (57.4%)         |
|                                | <b>NA</b>                       | 41 (32.3%)                                           | 4 (2.4%)           |
| <b>NtAi signature</b>          | <b>Low</b>                      | 21 (16.5%)                                           | 76 (45%)           |
|                                | <b>High</b>                     | 34 (26.8%)                                           | 88 (52%)           |
|                                | <b>NA</b>                       | 72 (56.7%)                                           | 5 (3%)             |
| <b>HRD score</b>               | <b>Low</b>                      | 24 (18.9%)                                           | 71 (42%)           |
|                                | <b>High</b>                     | 31 (24.4%)                                           | 93 (55%)           |
|                                | <b>NA</b>                       | 72 (56.7%)                                           | 5 (3%)             |

| <b>Patient</b> | <b>HRD Status</b> | <b>Chemotherapy</b> | <b>PDX model</b> | <b>HRD Status</b> | <b>Chemotherapy</b> |
|----------------|-------------------|---------------------|------------------|-------------------|---------------------|
| Patient 1      | HRD               |                     | OV5              | HRD               |                     |
| Patient 2      | HRD               | Sensitive           | OV10             | HRD               | Sensitive           |
| Patient 3      | HRP               | Sensitive           | OV16             | HRP               | Sensitive           |
| Patient 4      | HRP               | Resistant           | OV26             | HRP               | Sensitive           |
| Patient 5      | HRD               |                     | OV8              | NA                |                     |
| Patient 6      | HRP               | Resistant           | OV14             | HRP               | Resistant           |
| Patient 7      | HRP               | Resistant           | OV21             | HRP               | Resistant           |
| Patient 8      | HRD               | Sensitive           | OV25             | HRD               | Sensitive           |
| Patient 9      | HRD               | Sensitive           | OV38             | HRD               | Sensitive           |
| Patient 10     | HRD               |                     | OV54             | HRD               |                     |

**Table S1. Relative to Figure 1. Comparative description of the clinical parameters of the Institut Curie and TCGA cohorts of HGSOC patients**

Top, Clinical parameters from Institut Curie and TCGA cohorts used for proteomic and metabolomic. TCGA and Curie cohorts have previously been described (Cancer Genome Atlas Research, 2011; Gruosso et al., 2015; Mateescu et al., 2011). Tumor samples were obtained from a cohort of consecutive ovarian carcinoma patients, treated at the Institut Curie between 1989 and 2012. All analyzed samples have been collected prior to any chemotherapeutic treatment. For each patient, a surgical specimen was taken before chemotherapy for pathological analysis and tumor tissue cryopreservation. The median patient age was 61 years (range: 35-87 years). Ovarian carcinomas were classified according to the World Health Organization histological classification of gynecological tumors. Pathological analysis identified 127 high-grade serous tumors (100%). 21 subjects (16.6%) were considered as early stage (International Federation of Gynecology and Obstetrics (FIGO) I-II) and 98 subjects (77.2%) were considered as advanced stage (III and IV) of disease. Proliferation rate was assessed by pathologists using KI-67 and mitotic index. Metabolic syndromes such as diabetes, high blood pressure, dyslipidemia or high body mass index are indicated. Classification of ovarian carcinomas according to debulking efficiency was done into two subgroups: “no macroscopic residual disease” and “macroscopic residual disease”, this last group including patients with tumor residual disease of 1-10mm, 11-20mm and > 20mm, after surgery. Patients were treated with a combination of surgery and chemotherapy, the latter including platinum salts or platinum salts ± taxane, as a first line of treatment in most cases. Relapse at 12 months was defined as: date of relapse (progression or metastasis) – date of the end of 1<sup>st</sup> line of treatment. If the event appears before 12 months: relapse = yes, otherwise relapse = no. Genomic signatures reflecting the HR status was assessed by using three scores : LST,  $N_{TAI}$  and HRD.

Bottom, ovarian cancer Patient Derived Xenograft (PDX) mouse models fully recapitulate histopathological and molecular properties, such as HRD status, as well as response to chemotherapy (86% of correspondence) of the patient tumors from which they derived.

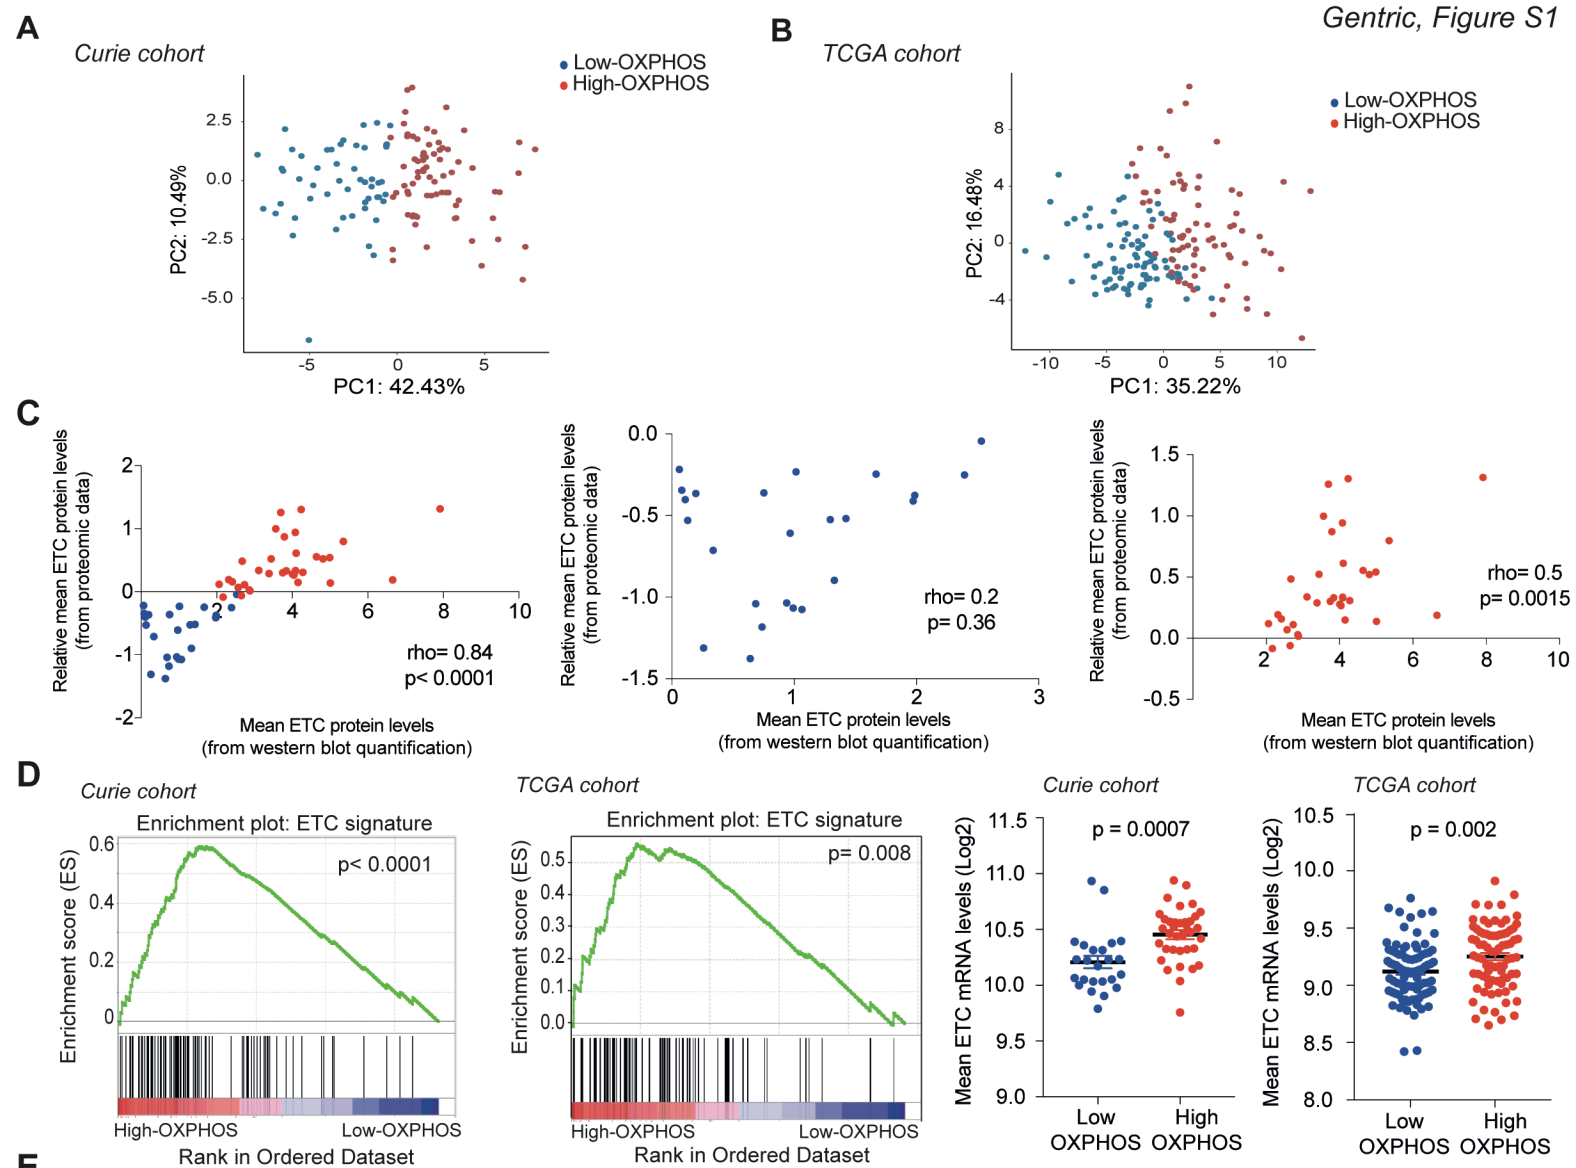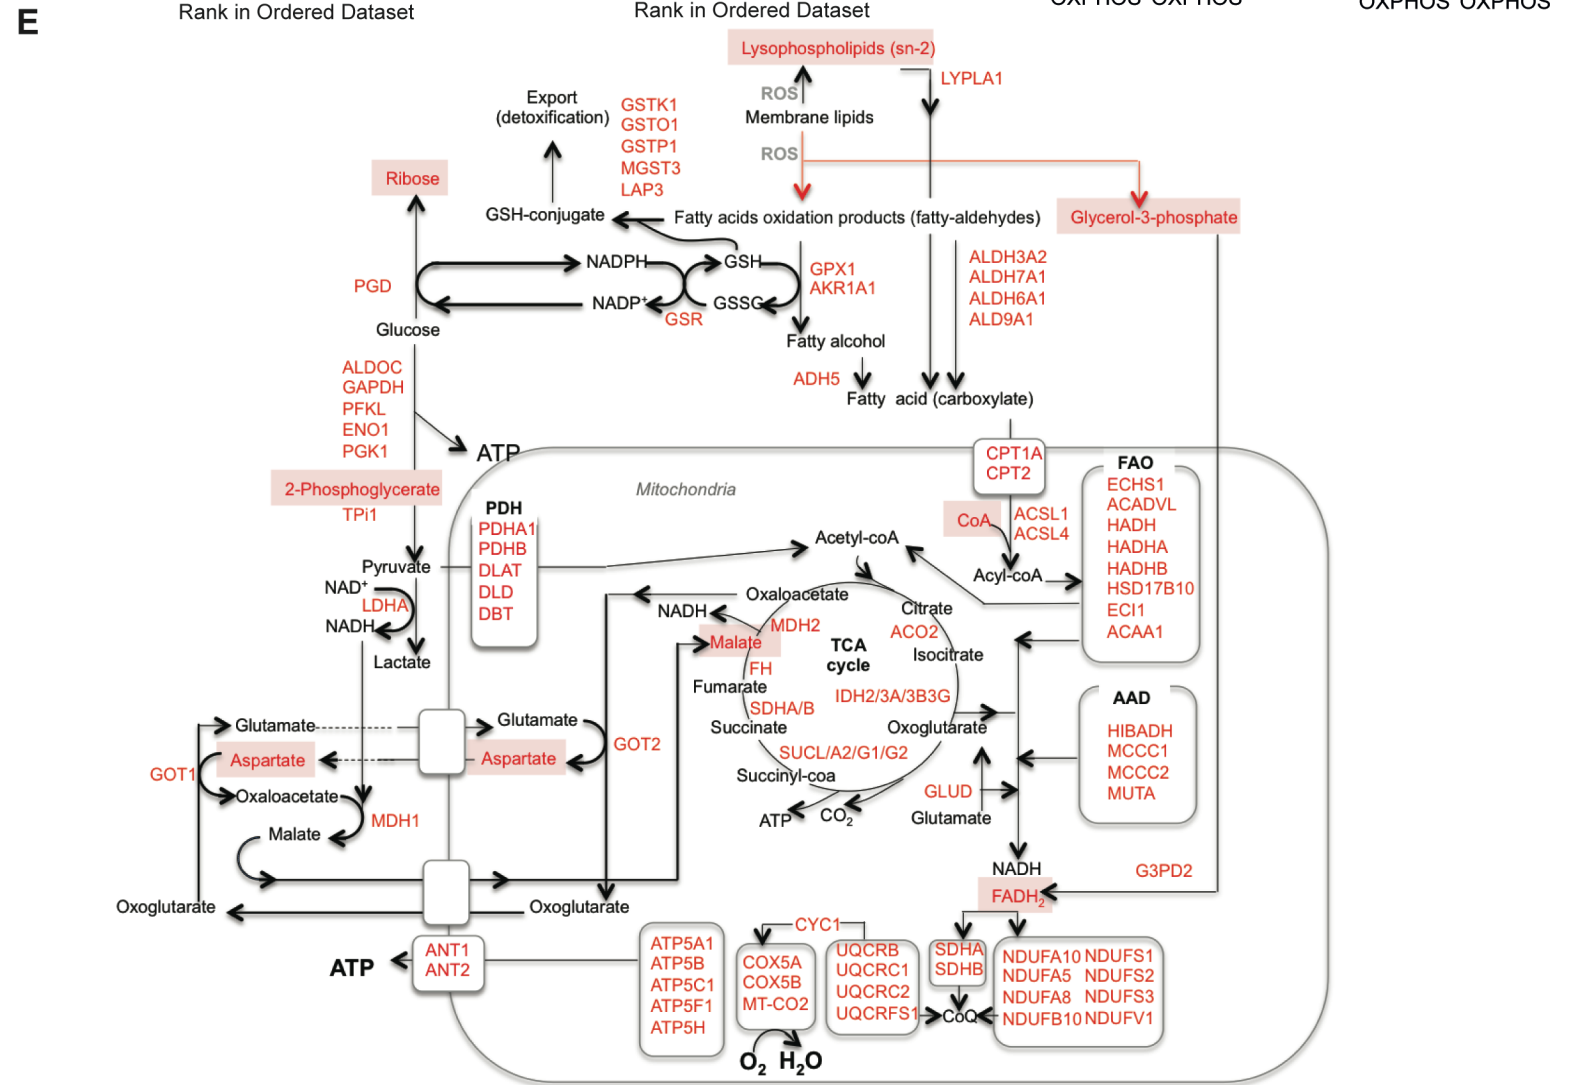

### **Figure S1. Related to Figure 1. Identification of two OXPHOS subgroups in HGSOC**

**(A, B)** Principal Component Analysis (PCA) applied on HGSOC proteomic data using ETC protein levels from Curie (N = 127 HGSOC) **(A)** and TCGA (N = 169 HGSOC) **(B)** cohorts. In Curie cohort, ETC protein levels have been standardized (centered and reduced) for each tumor sample. Normalization of TCGA data is described previously (Zhang et al., 2016). Low- and high-OXPHOS HGSOC are shown in blue and red, respectively. **(C)** Scatter plot showing positive correlation between the relative mean of 27 ETC protein levels defined by proteomic data (x axis) and of 5 ETC protein levels determined by western blot analysis (y axis) in low- (blue) and high- (red) OXPHOS (N = 58 HGSOC) **(Left)**, restricted to low- **(Middle)** or to high- **(Right)** OXPHOS. *P*-value is from Spearman test. **(D) Left**, Gene set-enrichment analysis showing enrichment plot of ETC genes in Curie **(left)** and TCGA **(right)** cohort, as indicated. ETC genes (listed in **Table S3**) showed significant enrichment in high-OXPHOS HGSOC versus low-OXPHOS HGSOC. *P*-values are from false discovery rate (FDR) *q*-value. **(Right)** Scatter plots showing the relative mean levels of 96 ETC mRNA expression in Curie **(Left, N = 60)** and TCGA **(Right, N = 169)** cohorts. Data are shown as mean  $\pm$  s.e.m. *P*-values are from Student's *t*-test. Low- (blue) and high- OXPHOS (red) HGSOC subgroups were defined according to the consensus clustering method. **(E)** Schematic representation of differential analyses of proteomic and metabolomic data from low- and high-OXPHOS HGSOC (Curie cohort). Represented are the major components of the metabolic rewiring observed in HGSOC, including glycolysis, fatty acid oxidation (FAO), reactive oxygen species detoxification, Amino Acid Degradation (AAD), malate-aspartate shuttle, the Tri-Carboxylic Acid (TCA) cycle and Electron Transport Chain (ETC) complexes. Proteins up-regulated in high- compared to low-OXPHOS HGSOC are written in red capital letters. Metabolites found in greater abundance in high- compared to low-OXPHOS HGSOC are shown in red boxes.

Table S3. Related to Figure S1, 3 and S3. List of ETC and NFE2L2-dependent antioxidant genes

| ETC gene list |         | NFE2L2-antioxidant gene list |         |
|---------------|---------|------------------------------|---------|
| MT-ND1        | COX5B   | ABCB6                        | PNKP    |
| MT-ND2        | COX6A1  | ABCG2                        | POLRMT  |
| MT-ND3        | COX6A2  | ABHD14B                      | PPIF    |
| MT-ND4        | COX6B1  | ALDH16A1                     | PRDX6   |
| MT-ND4L       | COX6B2  | ALDH3A2                      | PWP2H   |
| MT-ND5        | COX6C   | AMID                         | RDM1    |
| MT-ND6        | COX7A1  | ANKRD39                      | SEPP1   |
| NDUFA1        | COX7A2  | ASL                          | SFTPD   |
| NDUFA2        | COX7B   | ATOX1                        | SH3BP5  |
| NDUFA3        | COX7B2  | ATP5L                        | SIRT2   |
| NDUFA5        | COX7C   | ATPAF1                       | SLC19A1 |
| NDUFA6        | COX8A   | BLVRB                        | SLC5A6  |
| NDUFA7        | COX8C   | C5ORF23                      | SLC7A11 |
| NDUFA8        | MT-CO1  | CA2                          | SMURF1  |
| NDUFA9        | MT-CO2  | CAV2                         | SOD1    |
| NDUFA10       | MT-CO3  | CBR1                         | SOD2    |
| NDUFA11       | ATP5A1  | CCL5                         | SPPL2B  |
| NDUFA12       | ATP5B   | CCNE2                        | SRXN1   |
| NDUFA13       | ATP5C1  | CLCC1                        | THEM2   |
| NDUFAB1       | ATP5D   | DEPDC1B                      | TREX1   |
| NDUFB1        | ATP5E   | DHCR24                       | TTN     |
| NDUFB2        | ATP5F1  | DLAT                         | TXN     |
| NDUFB3        | ATP5G1  | EPHX1                        | TXNRD1  |
| NDUFB4        | ATP5G2  | EPHX2                        | UCP2    |
| NDUFB5        | ATP5G3  | EXOSC3                       | VLDLR   |
| NDUFB6        | ATP5H   | FAH                          | ZDHHC21 |
| NDUFB7        | ATP5I   | FBXO32                       | ZNF467  |
| NDUFB8        | ATP5J   | GCLM                         |         |
| NDUFB9        | ATP5J2  | GCNT2                        |         |
| NDUFB10       | ATP5L   | GPD2                         |         |
| NDUFB11       | ATP5L2  | GPT2                         |         |
| NDUFC1        | ATP5O   | GPX1                         |         |
| NDUFC2        | ATPIF1  | GPX2                         |         |
| NDUFS1        | MT-ATP6 | GPX3                         |         |
| NDUFS2        | MT-ATP8 | GSR                          |         |
| NDUFS3        |         | GTF2H4                       |         |
| NDUFS4        |         | HMOX1                        |         |
| NDUFS5        |         | IL17D                        |         |
| NDUFS6        |         | ISOC1                        |         |
| NDUFS7        |         | LIAS                         |         |
| NDUFS8        |         | LTB4DH                       |         |
| NDUFV1        |         | MAPK9                        |         |
| NDUFV2        |         | MCOLN1                       |         |
| NDUFV3        |         | MFSD3                        |         |
| SDHA          |         | MRPL4                        |         |
| SDHB          |         | MTHFD2L                      |         |
| SDHC          |         | MYC                          |         |
| SDHD          |         | NCF1                         |         |
| CYC1          |         | NLN                          |         |
| MT-CYB        |         | NOS2                         |         |
| UQCR10        |         | NOX4                         |         |
| UQCR11        |         | NOX5                         |         |
| UQCRB         |         | NQO1                         |         |
| UQCRC1        |         | NQO2                         |         |
| UQCRC2        |         | OXR1                         |         |
| UQCRFS1       |         | OXSR1                        |         |
| UQCRH         |         | P2RY6                        |         |
| UQCRQ         |         | PBK                          |         |
| COX4I1        |         | PEX6                         |         |
| COX4I2        |         | PIR                          |         |
| COX5A         |         | PLAA                         |         |

**Table S3. Related to Figure 1, 3 and S3. List of ETC and NFE2L2-dependent antioxidant genes**

List of ETC-encoding genes and NFE2L2-target genes analyzed in Figure S3B, S3C and Figure 3D, respectively.



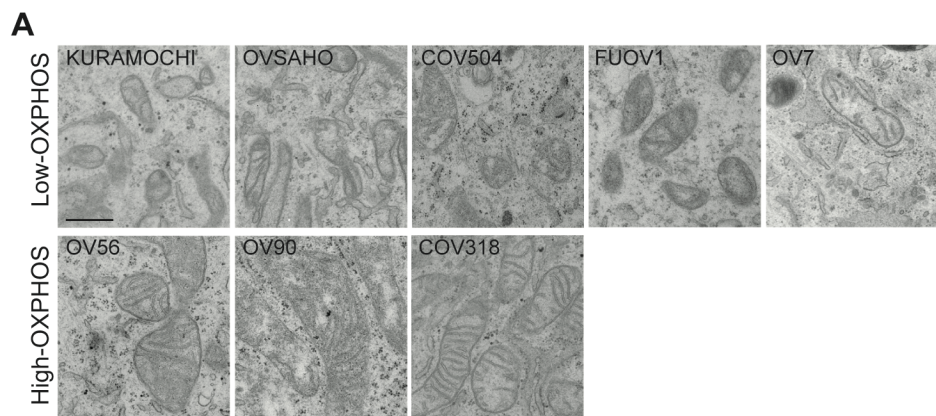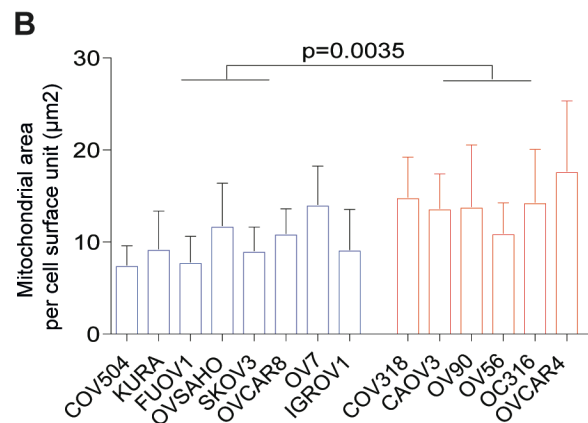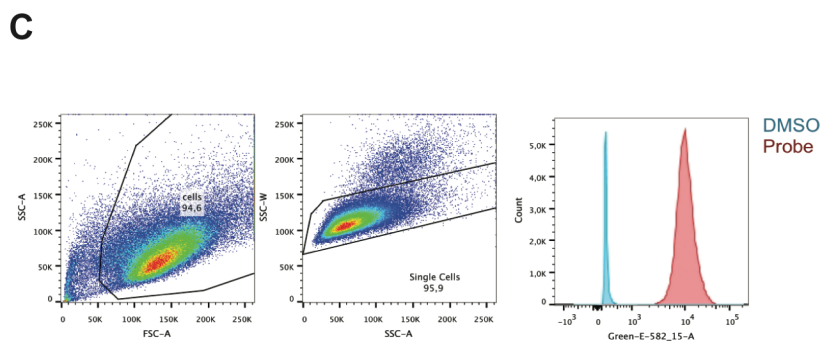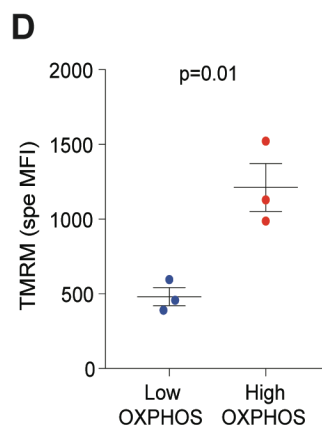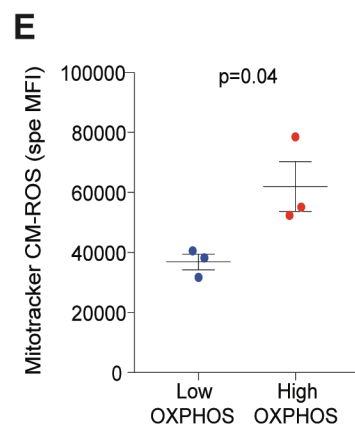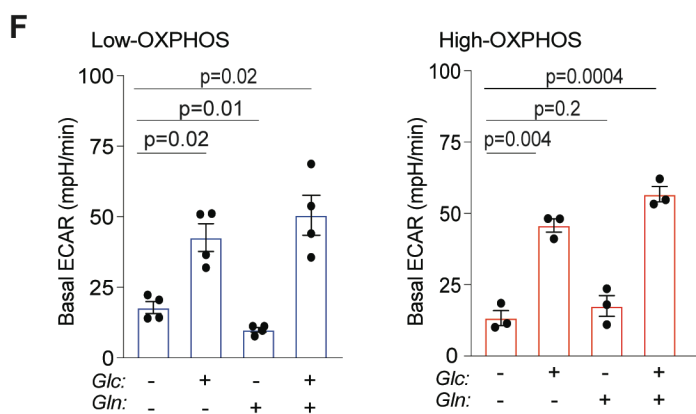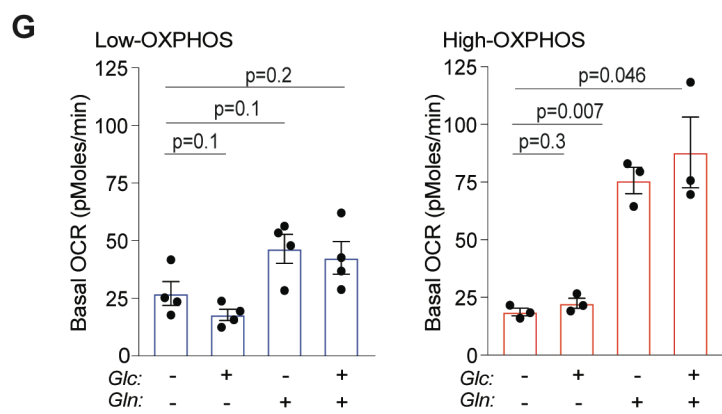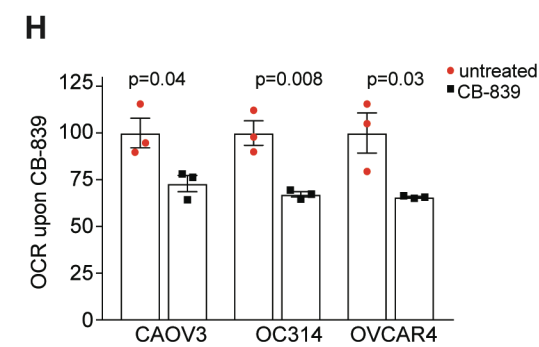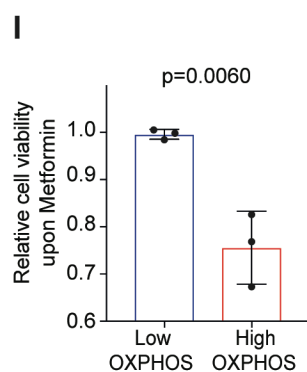

**Figure S2. Related to Figure 2. Mitochondrial characterization in low- and high-OXPHOS OCCL**

(A) Representative pictures of electron microscopy from low- and high-OXPHOS OCCL, as indicated. Scale bar = 0.5  $\mu\text{m}$ . (B) Bar plot showing mitochondrial area per unit of cell surface (in  $\mu\text{m}$ ), as assessed using electron microscopy, in low- (blue) and high- (red) OXPHOS OCCL. Data are shown as mean  $\pm$  s.e.m ( $n \geq 8$  pictures of electron microscopy analyzed per cell line). *P*-values are from Student's *t*-test. (C) Gating strategy used to measure specific MFI of Mitotracker and TMRM dyes. Debris and doublets were excluded based on SSC-A (side scatter), by FSC-A (forward scatter) parameters, and SSC-A by SSC-W parameters, respectively. DMSO was included as a negative control. (D, E) Scatter plots of specific MFI of TMRM (D) Mitotracker CM-ROS (E) dyes in low-(IGROV1, SKOV3, OVCAR8) and high-(CAOV3, OC314, OVCAR4) OXPHOS OCCL. Data are shown as mean  $\pm$  s.e.m ( $n = 3$  independent experiments). *P*-values are from Student's *t*-test. (F, G) Bar plots showing basal Extracellular Acidification Rate (EACR) (F) and OCR (G) in the presence of 10 mM glucose (Glc) or 2mM glutamine (Gln) or in control conditions (no Glc no Gln; or in presence of 10mM Glc + 2mM Gln) in low-(IGROV1, SKOV3, OVCAR8, OV7) (Left) and high-(CAOV3, OC314, OVCAR4) (Right) OXPHOS OCCL. Cells were incubated overnight in specific carbon media, as indicated. Data are shown as mean  $\pm$  s.e.m ( $n \geq 3$  independent experiments). Each dot represents the mean value obtained in at least 3 independent experiments per cell line. *P*-values are from paired *t*-test. (H) Bar plot showing basal OCR in high-OXPHOS cells (CAOV3, OC314, OVCAR4) upon CB-839 treatment (10  $\mu\text{M}$ ) in the presence of 10 mM glucose + 2 mM glutamine in high-OXPHOS OCCL (CAOV3, OC314, OVCAR4), normalized to the mean of untreated condition for each cell line. Data are means  $\pm$  s.e.m ( $n = 3$  independent experiments). *P*-values from Student's *t*-test. (I) Bar plot showing variation in relative cell viability of low-(IGROV1, SKOV3, OVCAR8) and high- (CAOV3, OC314, OVCAR4) OXPHOS OCCL after 4 days of Metformin [ $10^{-2}\text{M}$ ] treatment. All data are relative to vehicle-treated controls. Data are shown as mean  $\pm$  s.e.m ( $n = 3$  independent experiments). *P*-values are from Student-*t*-test.

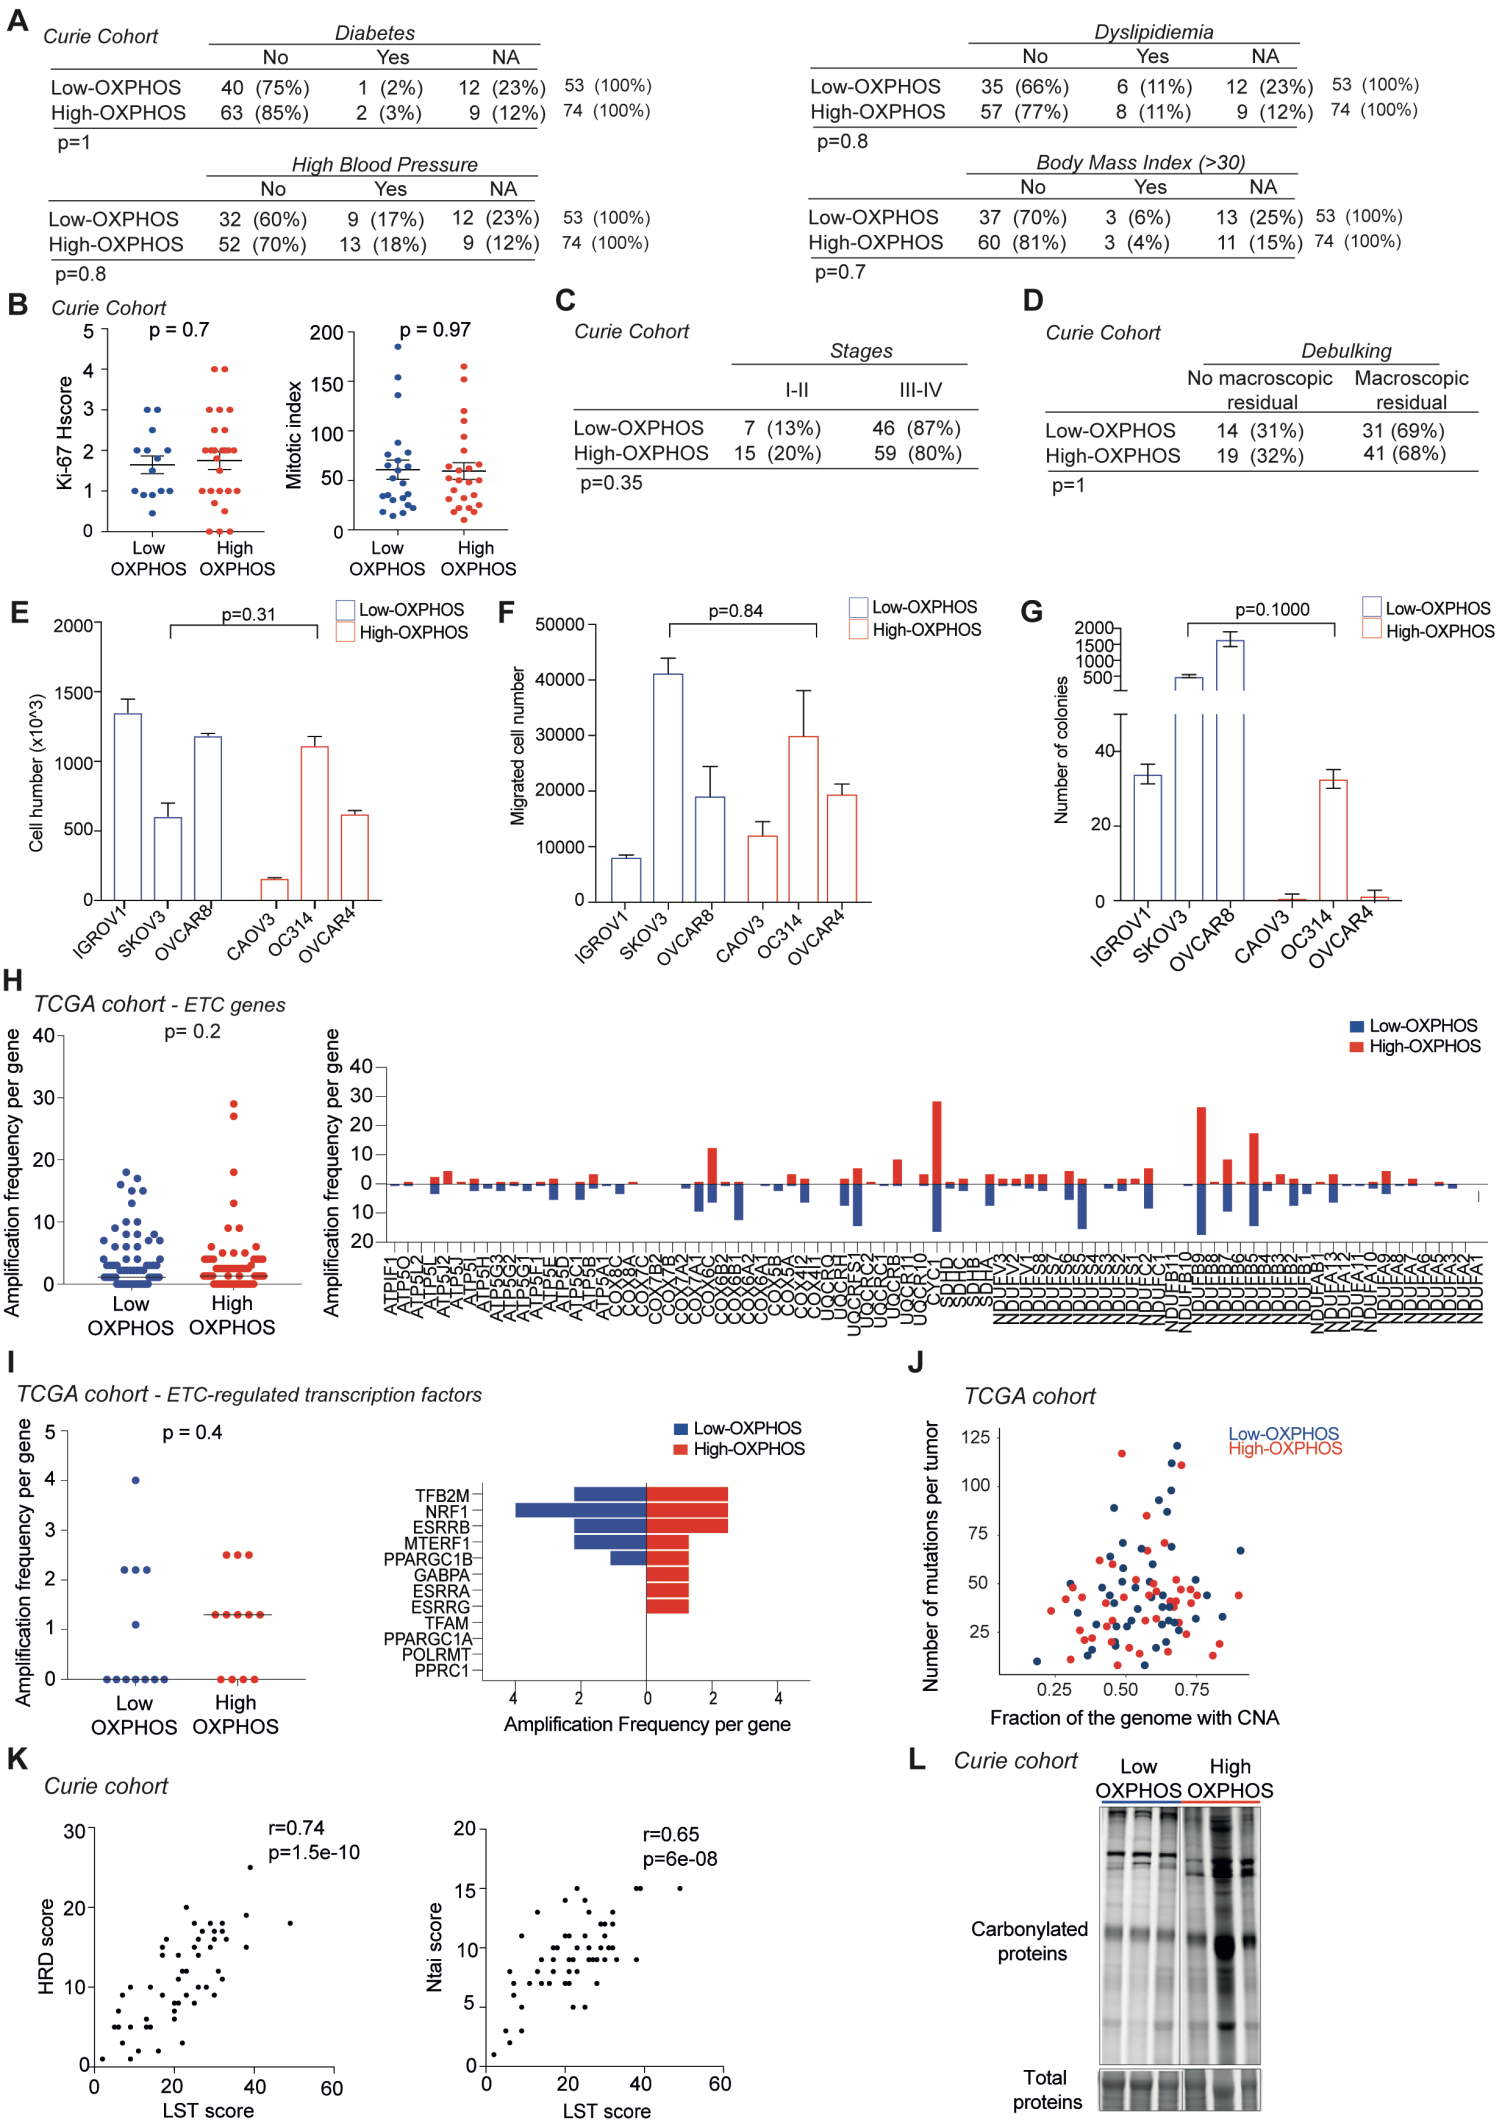

**Figure S3. Related to Figure 3. Analyses of cellular properties and genomic alterations in high-OXPPOS HGSOc**

**(A)** Contingency tables showing the repartition of low- and high-OXPPOS HGSOc from Curie cohort (N = 127) according to metabolic syndromes, including diabetes, dyslipidemia, high blood pressure and body mass index higher than 30. *P*-values are from Fisher's exact test. **(B)** Scatter plot showing Ki-67 (**Left**) and mitotic index (**Right**) in low- (blue) and high- (red) HGSOc from Curie cohort (N = 46). *P*-values are from Student-t-test. **(C, D)** Contingency tables showing the repartition of low- and high-OXPPOS HGSOc from Curie cohort (N = 127) according to stages (C) and debulking status (D). *P*-values are from Fisher's exact test. **(E)** Bar plot showing the cell number in low- (IGROV1, SKOV3, OVCAR8) and high- (CAOV3, OC314, OVCAR4) OXPPOS OCCL after 7 days of culture. Data are shown as mean  $\pm$  s.e.m (n = 2 independent experiments). *P*-values are from Student-t-test. **(F)** Bar plot showing cell migration number in low- (IGROV1, SKOV3, OVCAR8) and high- (CAOV3, OC314, OVCAR4) OXPPOS OCCL. Data are shown as mean  $\pm$  s.e.m (n = 2 independent experiments). *P*-values are from Student-t-test. **(G)** Bar plot showing the number of colonies in low- (IGROV1, SKOV3, OVCAR8) and high- (CAOV3, OC314, OVCAR4) OXPPOS OCCL. Data are shown as mean  $\pm$  s.e.m (n = 3 independent experiments). *P*-values are from Student-t-test. **(H) Left**, Scatter plot showing amplification frequency per ETC gene in low- (blue) (N=88) and high- (red) (N=79) OXPPOS HGSOc from TCGA cohort. The median is indicated. *P*-values are from Wilcoxon test. **Right**, Bar plot showing amplification frequency per ETC gene, as on left. **(I) Left**, Scatter plot showing amplification frequency per gene encoding ETC-related transcription factor (listed on the right) in low- (blue) (N=88) and high- (red) (N=79) OXPPOS HGSOc from TCGA cohort. The median is indicated. *P*-values are from Wilcoxon test. **Right**, Bar plot showing amplification frequency per ETC-related transcription factor gene, as on left. **(J)** Plot showing absence of association between OXPPOS status (low-OXPPOS in blue, N = 46 and high-OXPPOS in red, N = 43) and mutation counts or copy number alterations (CNA) per tumor from TCGA cohort. **(K)** Plot showing the correlation between LST score and HRD score (Left) or  $N_{tai}$

score (Right) in HGSOC from Curie cohort (N = 55). *P*-values are from Spearman test. **(L)** Western blot showing carbonylated protein profiles in 3 representative low- and high OXPPOS HGSOC **(Top)**. SyproRuby coloration is used as control for total protein levels **(Bottom)**.

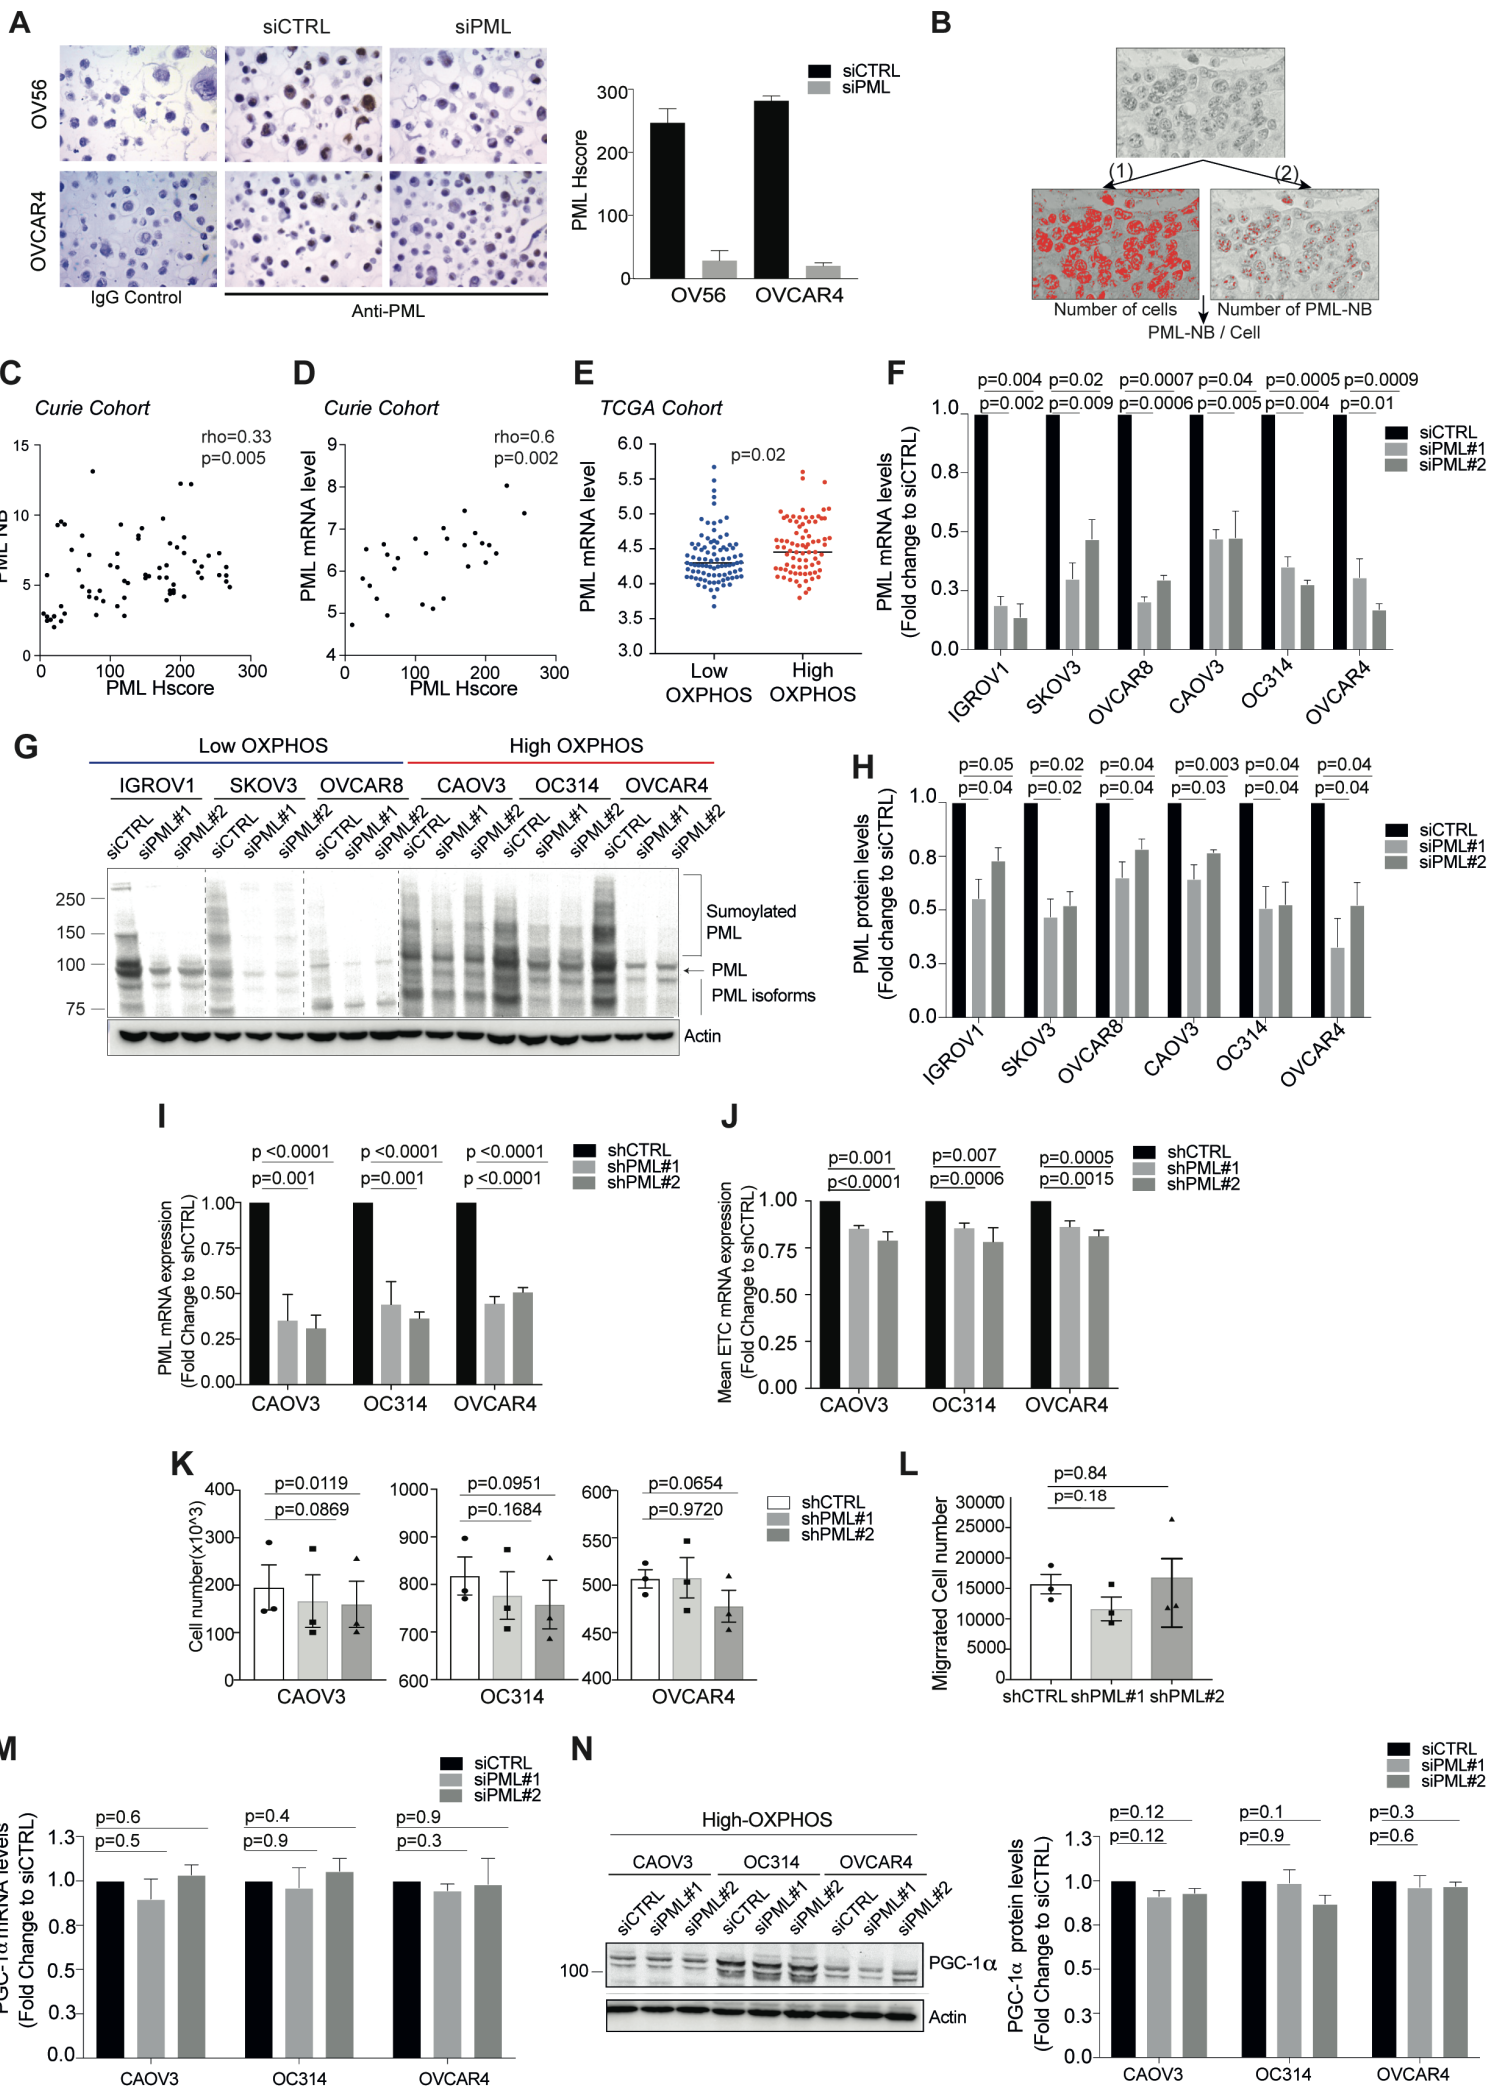

**Figure S4. Related to Figure 4. PML: antibody specificity and silencing effect in OCCL**

**(A) Left:** Representative views of PML immunostaining on sections from paraffin-embedded OCCL after transfection either with non-targeting siRNA (siCTRL) or with a pool of siRNA targeting PML in order to test the specificity of the antibody used. **Right:** Bar plot showing PML-silencing efficiency (Hscore = Intensity of staining x % of cells stained). **(B)** Macro steps in ImageJ software to determine PML-NB per cell. **(C)** Scatter plot showing positive correlation between PML Hscore and PML-NB in HGSOE (N=71 HGSOE). *P*-value is from Spearman test. **(D)** Scatter plot showing positive correlation between PML Hscore and PML mRNA level in HGSOE (N=27 HGSOE). *P*-value is from Spearman test. **(E)** Scatter plot showing PML mRNA levels from TCGA cohort. The median is indicated (N = 169 HGSOE). *P*-values are from Mann-Whitney test. **(F)** Bar plot showing the fold change of PML mRNA levels in low- and high-OXPHOS OCCL transfected either with non-targeting siRNA (siCTRL) or with 2 different siRNA targeting PML (siPML#1, #2). qRT-PCR data are shown as mean of fold change normalized to non-targeting siRNA  $\pm$  s.e.m ( $n \geq 3$  independent experiments). *P*-values are from one sample t-test. **(G)** Representative WB showing PML protein levels 48 hours post-transfection either with non-targeting siRNA (siCTRL) or with 2 different siRNA targeting PML (siPML#1, #2). Actin is used as an internal control for protein loading and normalization. All samples were run together on the same gel, but we used different exposition to show better the PML silencing effect, as indicated by the dotted line **(H)** Bar plot showing the fold change of PML protein levels 48 hours post transfection normalized to siCTRL and assessed by quantification of WB, as shown in (G). OCCL are transfected with either non-targeting siRNA (siCTRL) or 2 different siRNA targeting PML (siPML#1, siPML#2). Data are shown as mean  $\pm$  s.e.m ( $n = 3$  independent experiments). *P*-values are from one sample t test. **(I)** Bar plot showing the fold change of PML mRNA levels in high-OXPHOS OCCL transfected either with non-targeting shRNA (shCTRL) or with 2 different shRNA targeting PML (shPML#1, #2). qRT-PCR data are shown as mean of fold change normalized to non-targeting shRNA  $\pm$  s.e.m ( $n = 3$  independent experiments). *P*-values are from one sample t-test. **(J)** Bar plot showing the fold change in mean ETC mRNA levels in high-

OXPPOS OCCL transfected either with non-targeting shRNA (shCTRL) or with 2 different shRNA targeting PML (shPML#1, #2). 5 ETC (ATP5A, UQCR2, SDHB, COXII, NDUFB8) mRNA were analyzed to determine the mean ETC mRNA level. qRT-PCR data are expressed as the mean fold change normalized to non-targeting shRNA (n = 3 independent experiments). *P*-values are from one sample t test. **(K)** Bar plot showing the cell number in high-OXPPOS OCCL (CAOV3, left; OC314, middle; OVCAR4, right) transfected either with non-targeting shRNA (shCTRL) or with 2 different shRNA targeting PML (shPML#1, #2) after 7 days of culture. Data are shown as mean  $\pm$  s.e.m (n = 3 independent experiments). *P*-values are from Student-t-test. **(L)** Bar plot showing cell migration number in and high-(CAOV3, OC314, OVCAR4) OXPPOS OCCL transfected either with non-targeting shRNA (shCTRL) or with 2 different shRNA targeting PML (shPML#1, #2). Data are shown as mean  $\pm$  s.e.m (n = 3 independent experiments). *P*-values are from Student-t-test. **(M)** Bar plot showing the fold change of PGC-1 $\alpha$  mRNA levels in high-OXPPOS OCCL transfected either with non-targeting siRNA (siCTRL) or with 2 different siRNA targeting PML (siPML#1, #2). qRT-PCR data are normalized to non-targeting siRNA and shown as the mean of fold change  $\pm$  s.e.m (n = 3 independent experiments). *P*-values are from one sample t-test. **(N)** **Left**, Representative WB showing PGC-1 $\alpha$  protein level in high-OXPPOS OCCL transfected either with non-targeting siRNA (siCTRL) or with 2 different siRNA targeting PML (siPML#1, #2). Actin is used as an internal control for protein loading and normalisation. **Right**, Bar plot showing the fold change of PGC-1 $\alpha$  protein level upon PML silencing, as assessed by densitometry analysis of WB, as shown in (N). Data are shown as mean  $\pm$  s.e.m (n = 3 independent experiments). *P*-values are from one sample t test.



**A**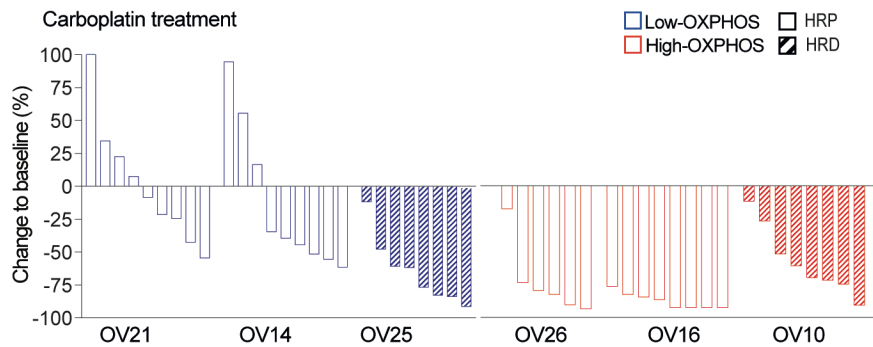**B**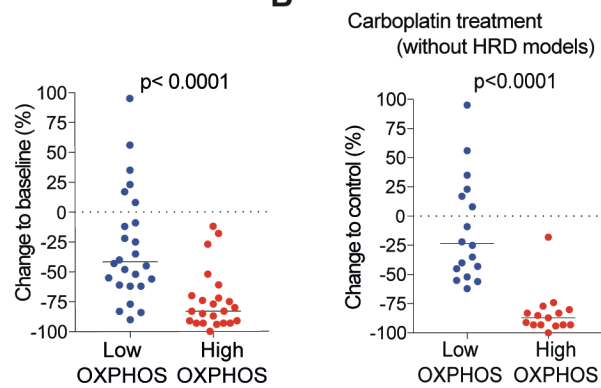**C**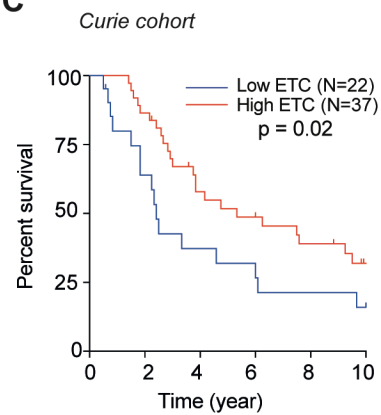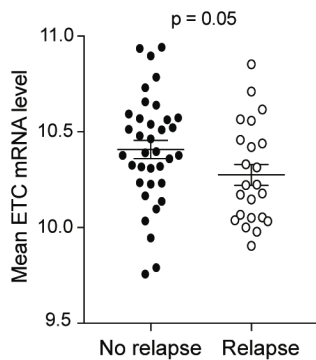**D**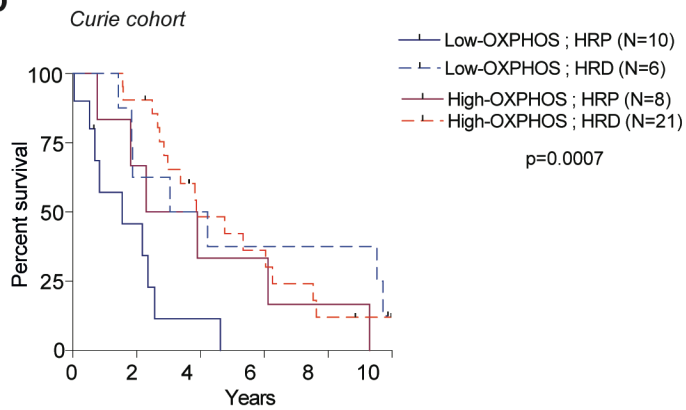

**Figure S5. Related to Figure 5. High-OXPPOS metabolism is associated with better survival and absence of relapse at 12 months in HGSOc patients**

**(A) Left**, Waterfall plots showing individual percent change to baseline at the end of treatment per mouse in all PDX models analyzed following carboplatin treatment. Baseline is the mean of the control group of mice. Low- and high-OXPPOS HGSOc PDX models are shown in blue and red, respectively. The percent of change to baseline is calculated using the following formula:  $(RTV \text{ from carboplatin treated mice} / RTV \text{ from control mice}) - 1 \times 100$ . **Right**, Scatter plot of data on left combining the different PDX models and comparing low- and high-OXPPOS, as indicated. *P*-values are from Mann-Whitney test. The median is indicated. **(B)** Scatter plot combining the percentage of change to baseline from the PDX models excluding the HRD PDX models and comparing low- (OV21 and OV14) and high- (OV26 and OV16) OXPPOS, as indicated. *P*-values are from Mann-Whitney test. The median is indicated. **(C)** Kaplan-Meier curves showing 10-years overall survival of HRD and HRP patients from Curie cohort with HGSOc of low- (blue) or high- (red) ETC subgroups based on the mean ETC mRNA level. *P*-values are from Log-rank test. **(Right)** Scatter plot showing the mean ETC mRNA level per HGSOc from Curie cohort according to the relapse status at 12 months after the end of the first line of chemotherapy treatment. Data are shown as mean  $\pm$  s.e.m. *P*-values are from Student's *t*-test. **(D)** Kaplan-Meier curves showing 10-years overall survival of patients from Curie cohort with HGSOc of low- (blue) or high- (red) OXPPOS subtypes and stratified in HRP (solid line) or HRD (dotted line) using the LST signature. *P* = 0.0007 from Log-rank test.
